# Supplementary material
Source: Springer Nature journal article supplement (https://www.springermedizin.de/resource/supplementary/12943_2007_278_MOESM1_ESM.pdf/9553840)

A

AD

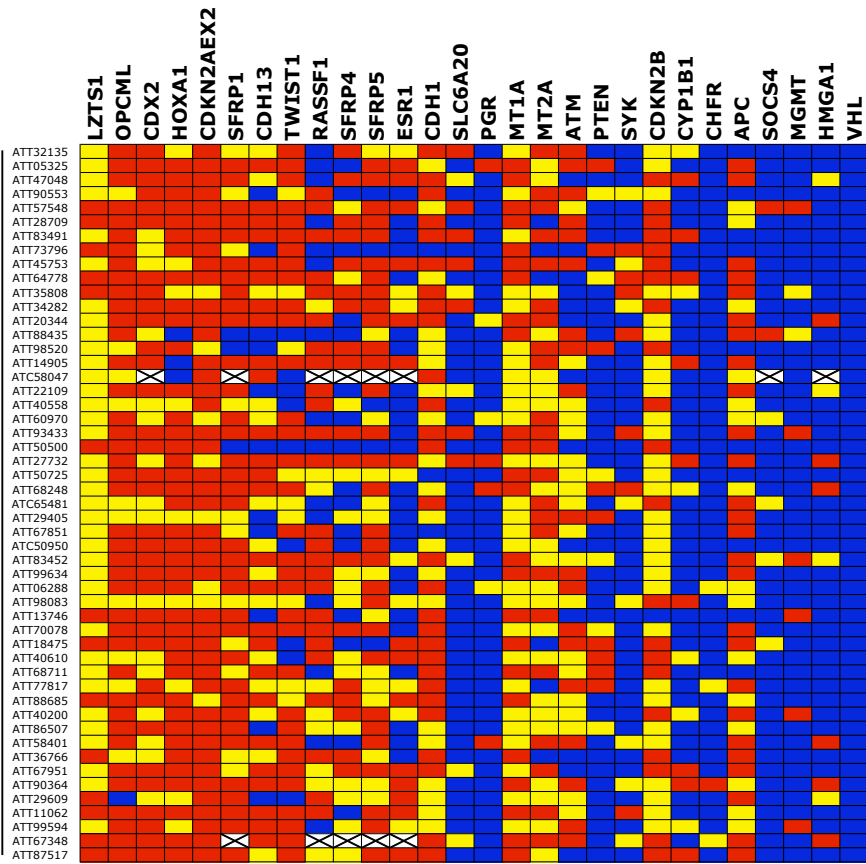

B

AdjNTL

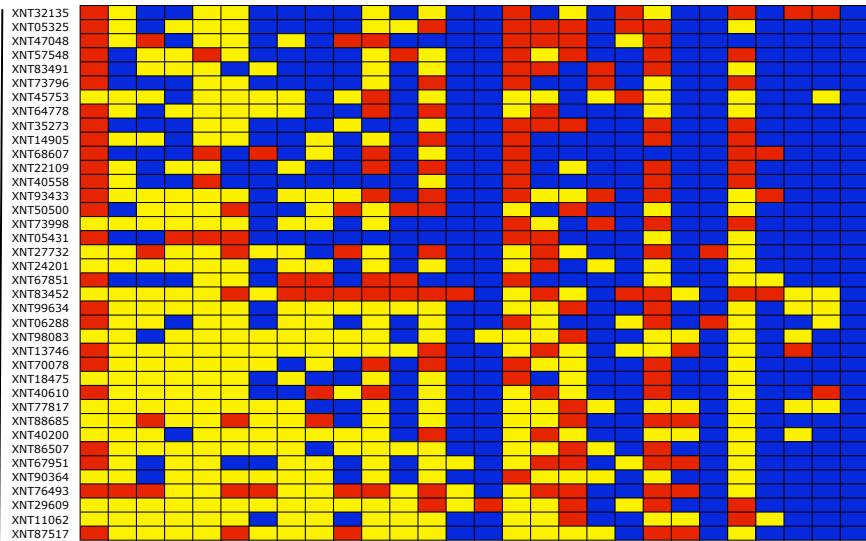

C

NTL

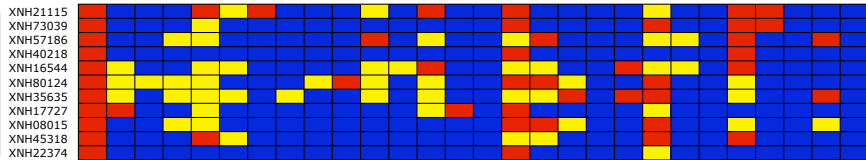

Supplement: MOESM1 [file 9553840]
